# Supplementary material for: Brain synchronization during perception of facial emotional expressions with natural and unnatural dynamics
Source: PubMed Central journal article supplement (PMC5517022; doi:10.1371/journal.pone.0181225), 2017-07-19
Supplement: pone.0181225.s001.pdf [file pone.0181225.s001.pdf]

Figure A.

Topography with *PLI* (a) and *WP* (b) time-frequency diagrams (21 electrodes of the 10-20 international system) depicting the bootstrap ratios of the element saliences of the 1st PLS LV for the comparison Natural Dynamic with Static. The respective brain scores' contrasts are shown as bar graphs at the bottom left corners of each plot.

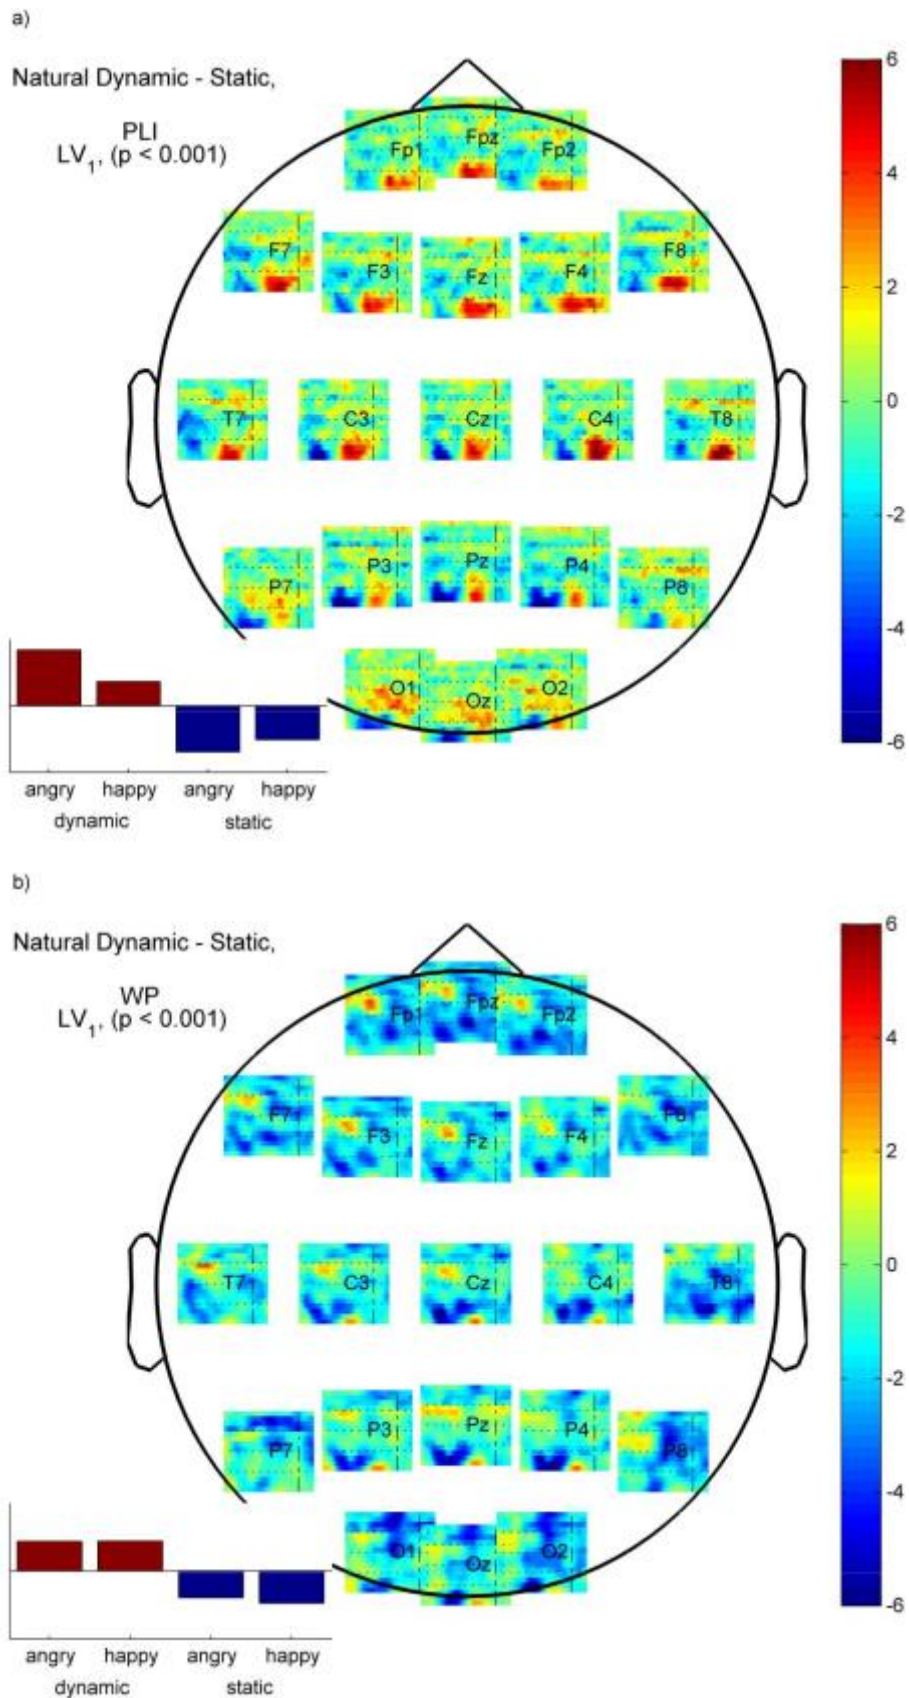

Figure B.

Topography with *PLI* (a) and *WP* (c) time-frequency diagrams (21 electrodes of the 10-20 international system) depicting the bootstrap ratios of the element saliences of the 1st PLS LV for the comparison Natural Dynamic with Dynamic Unnatural. (b) shows the 2nd significant LV for *PLI* describing the interaction effect between the MOTION and EXPRESSION factors. The respective brain scores' contrasts are shown as bar graphs at the bottom left corners of each plot.

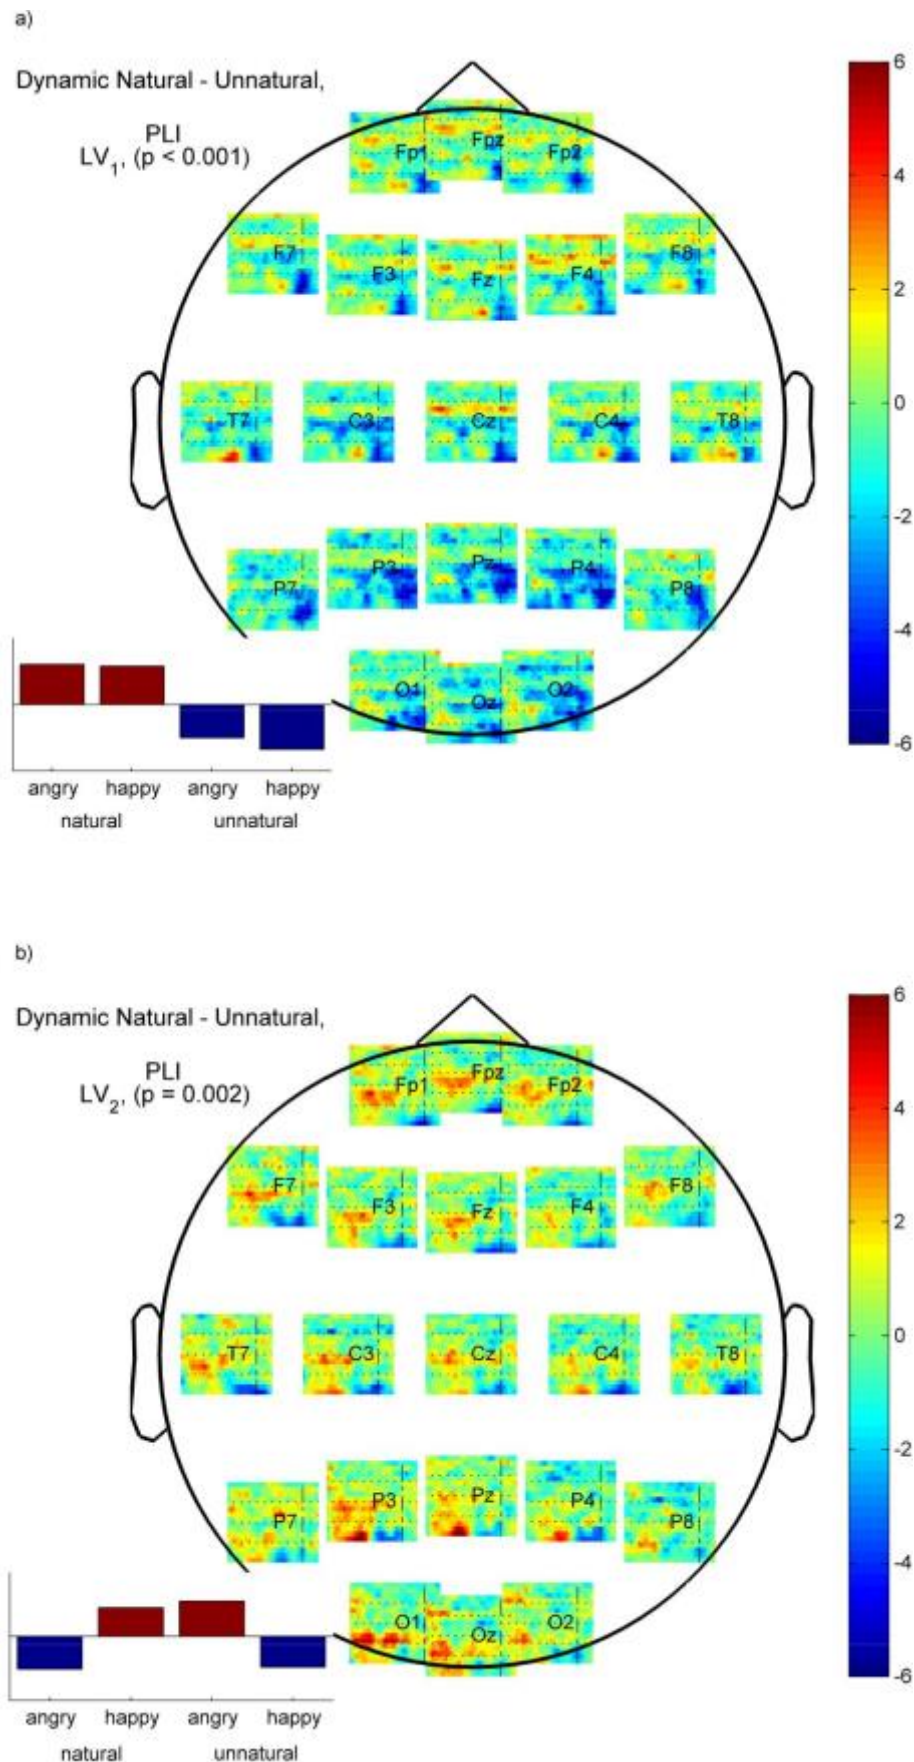

c)

Dynamic Natural - Unnatural,

WP  
LV<sub>1</sub>, (p < 0.001)

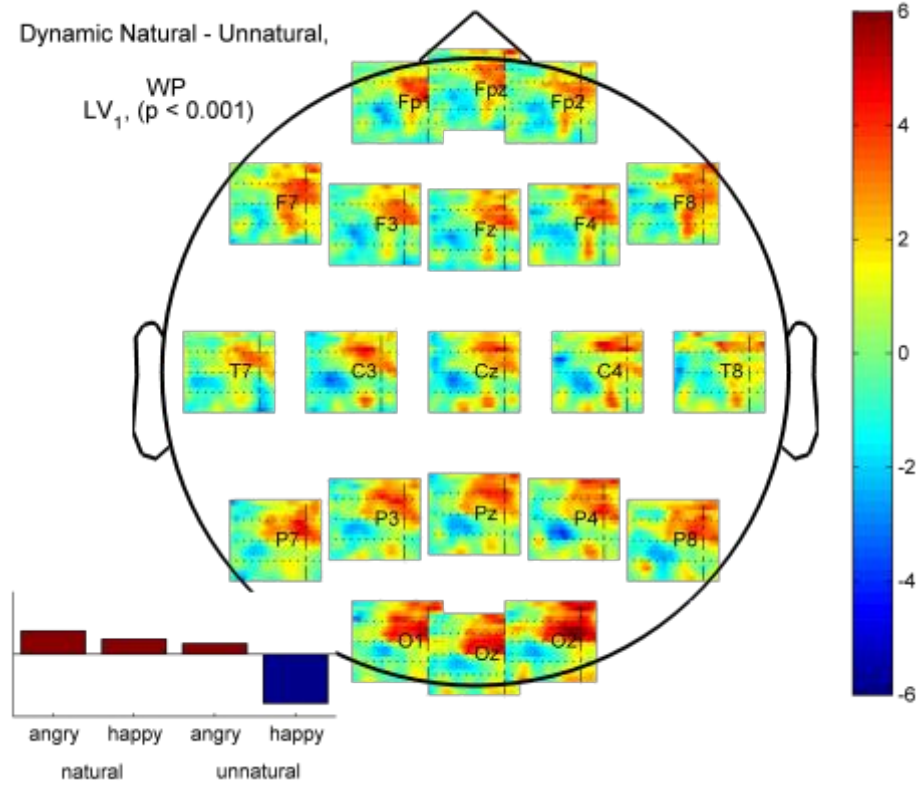

Figure C.

Topography with *PLI* (a) and *WP* (b) time-frequency diagrams (21 electrodes of the 10-20 international system) of the Angry Natural Dynamic condition.

a)

Angry Natural Dynamic,

PLI

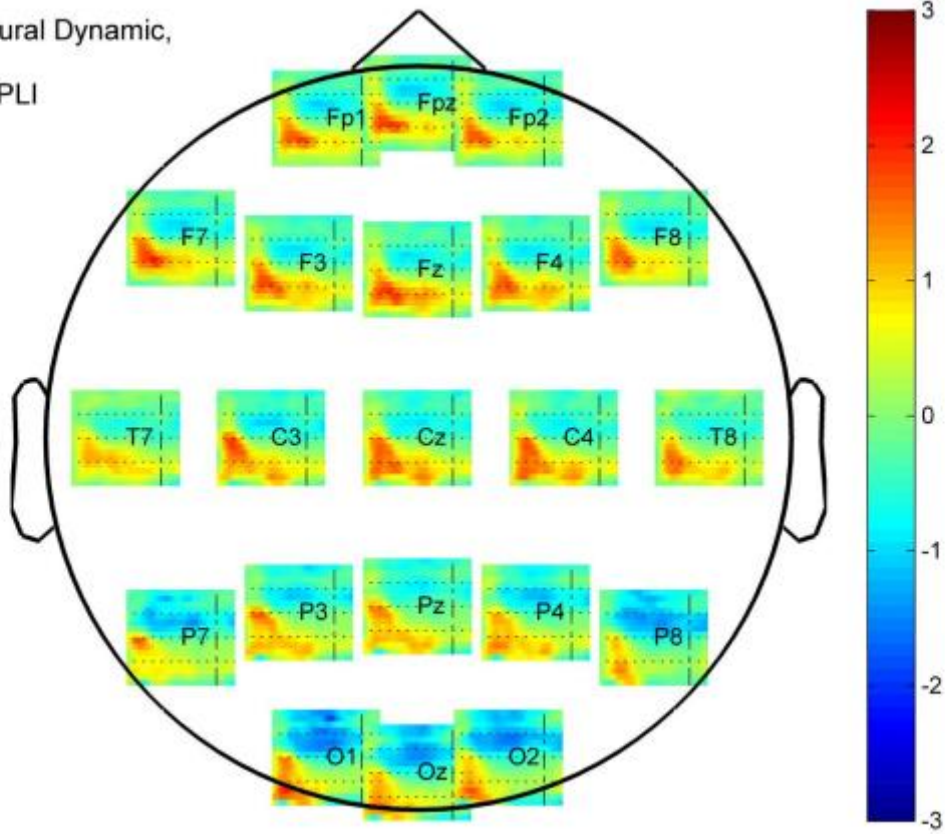

b)

Angry Natural Dynamic,

WP

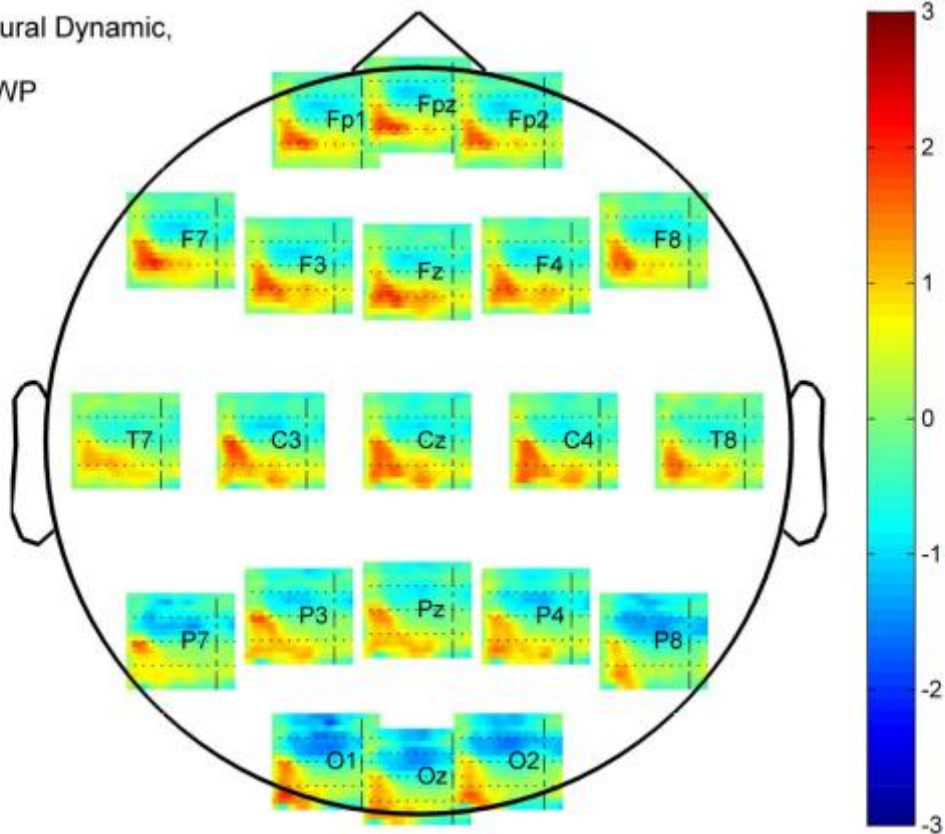

Figure D.

Topography with *PLI* (a) and *WP* (b) time-frequency diagrams (21 electrodes of the 10-20 international system) of the Happy Natural Dynamic condition.

a)

Happy Natural Dynamic,

PLI

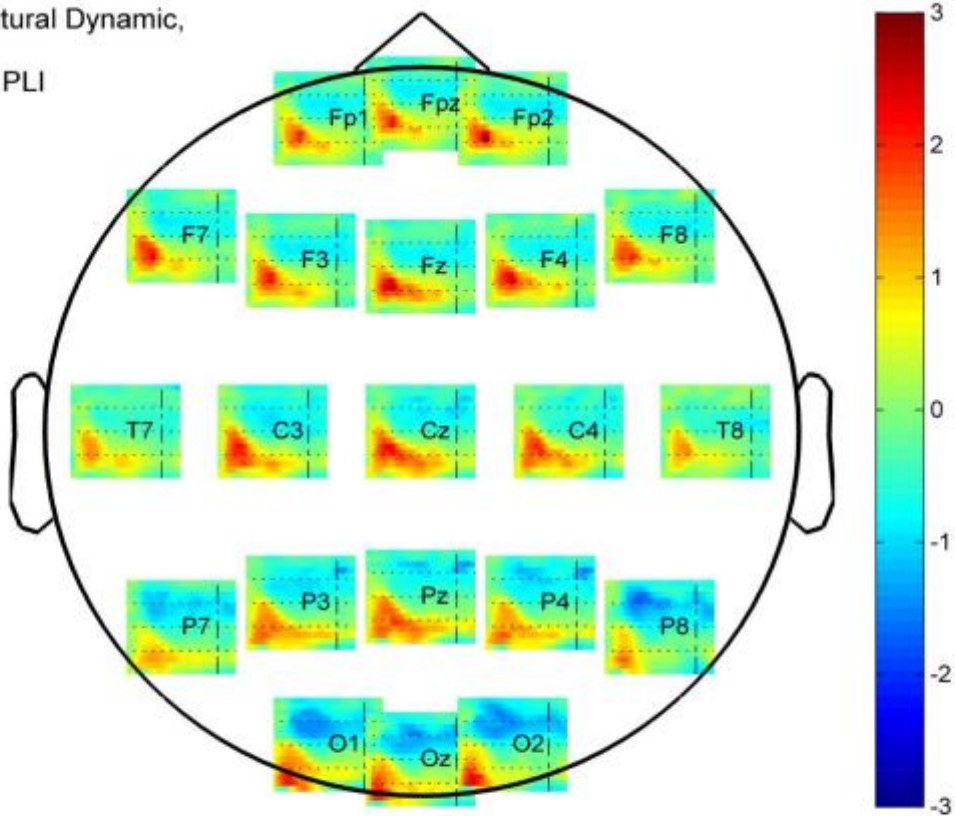

b)

Happy Natural Dynamic,

WP

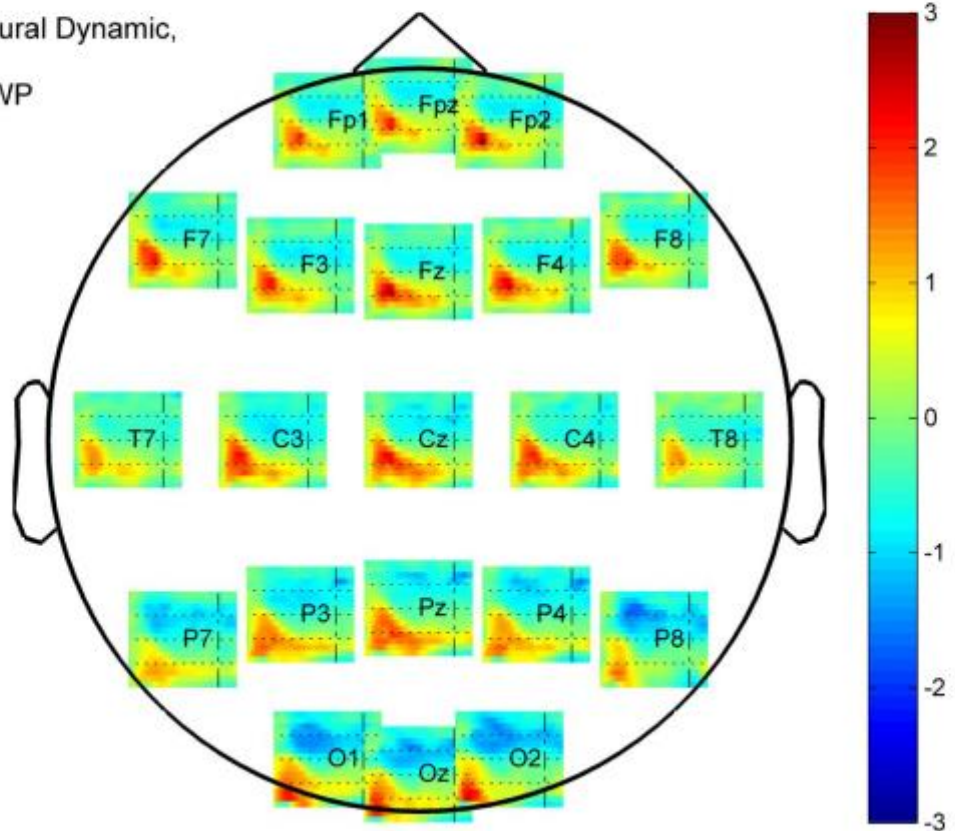

Figure E.

Topography with *PLI* (a) and *WP* (b) time-frequency diagrams (21 electrodes of the 10-20 international system) of the Angry Static condition.

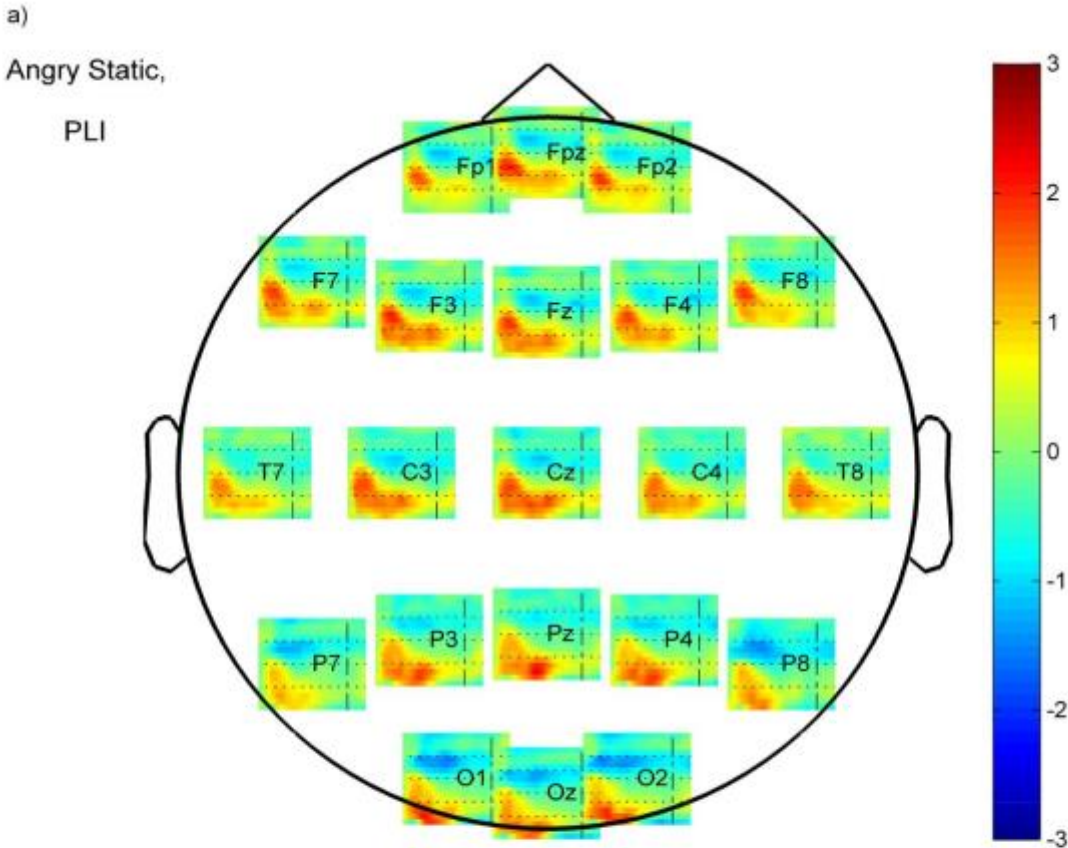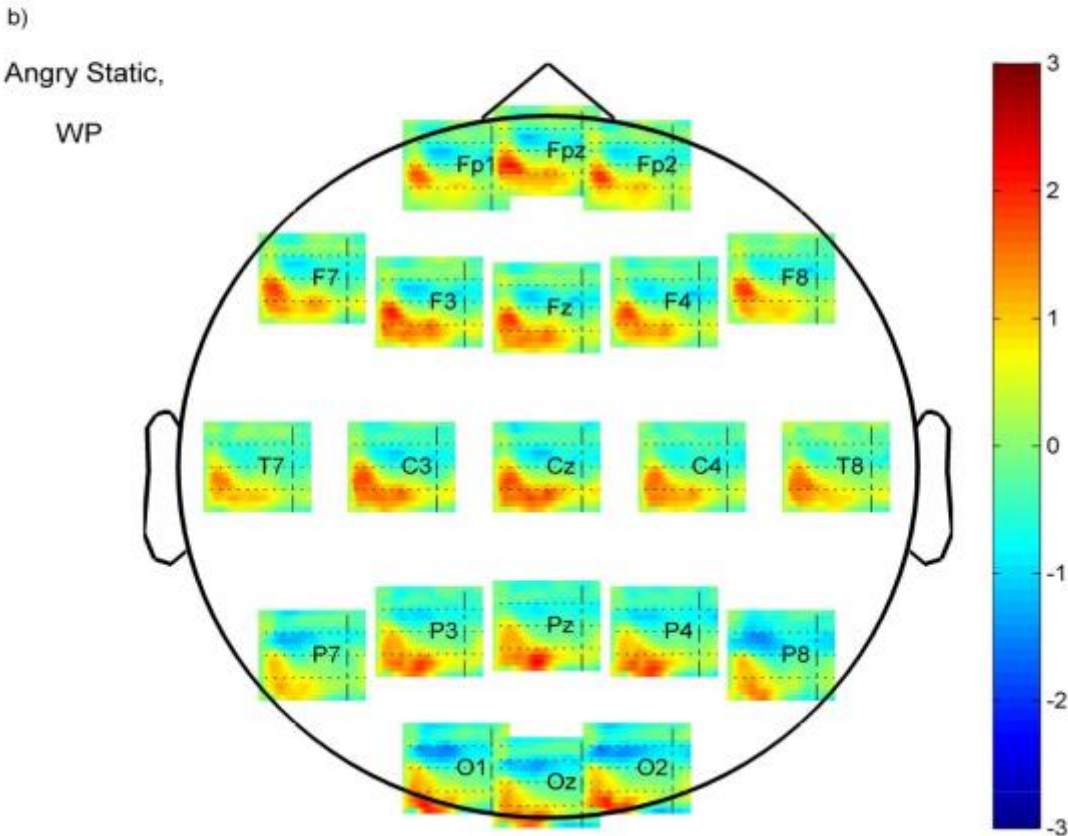

Figure F.

Topography with *PLI* (a) and *WP* (b) time-frequency diagrams (21 electrodes of the 10-20 international system) of the Happy Static condition.

a)

Happy Static,

PLI

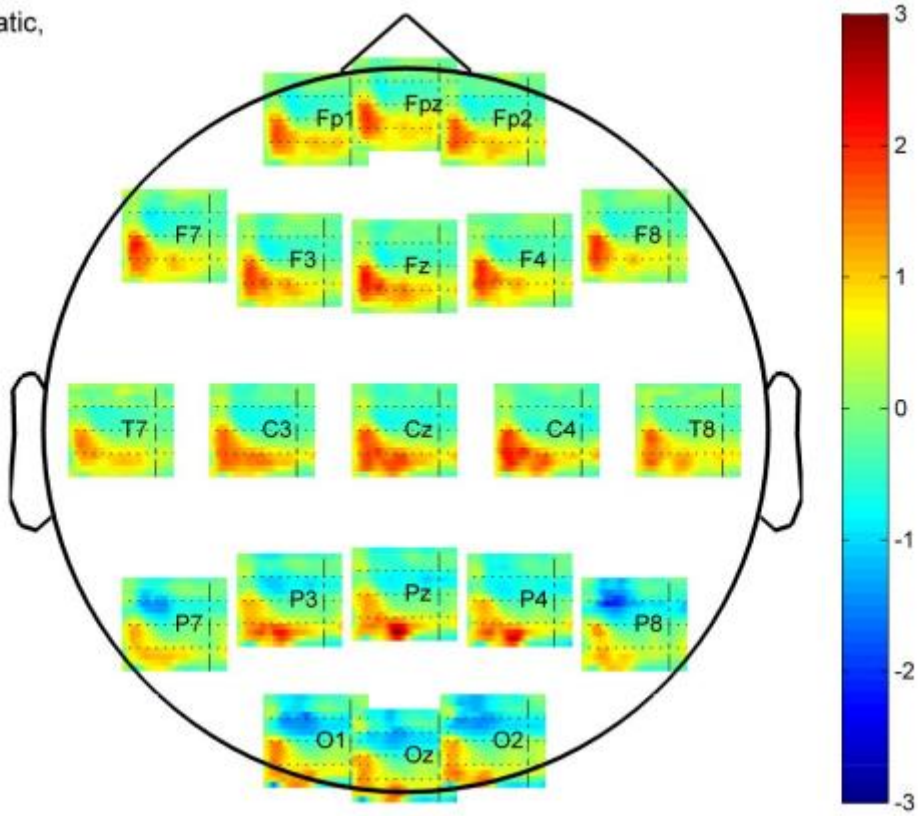

b)

Happy Static,

WP

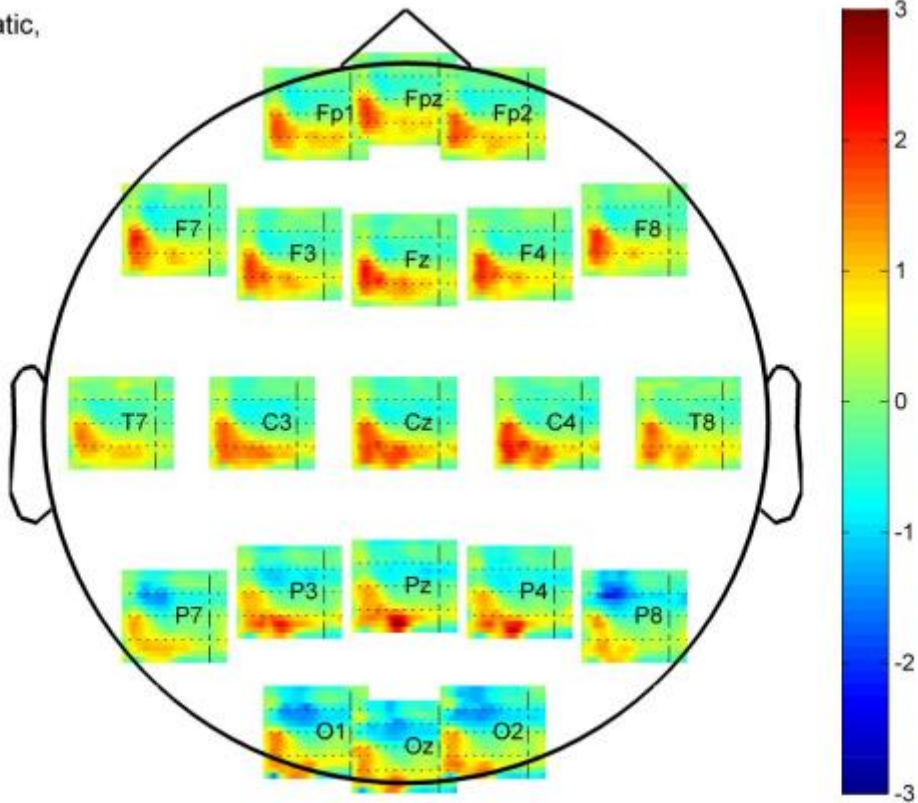

Figure G.

Topography with *PLI* (a) and *WP* (b) time-frequency diagrams (21 electrodes of the 10-20 international system) of the Angry Unnatural Dynamic condition.

a)

Angry Unnatural Dynamic,

PLI

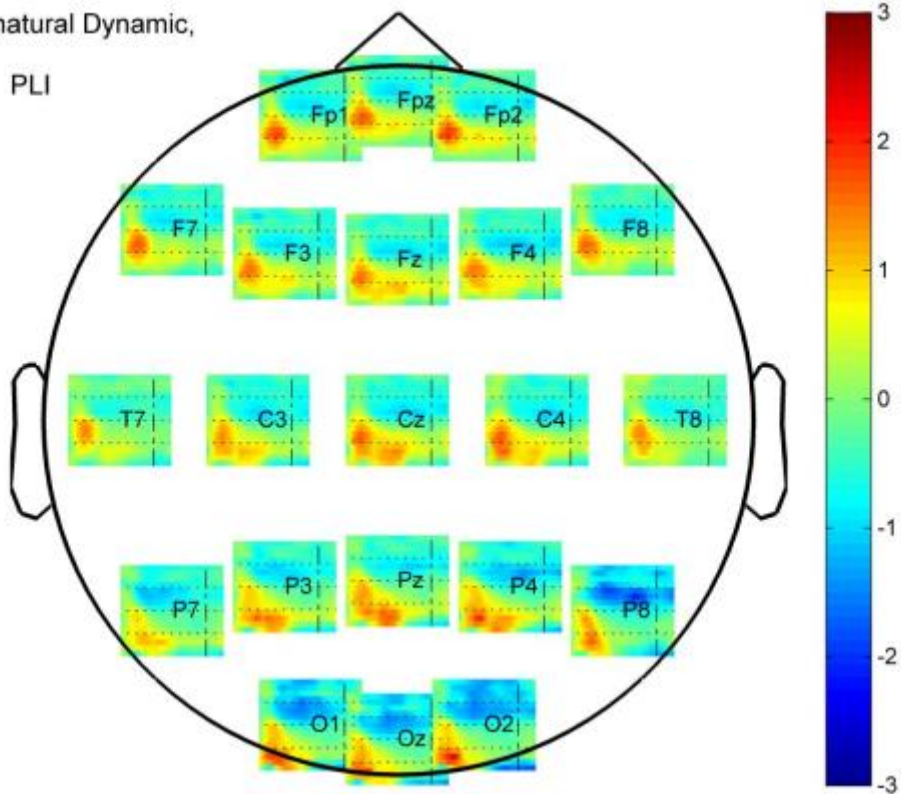

b)

Angry Unnatural Dynamic,

WP

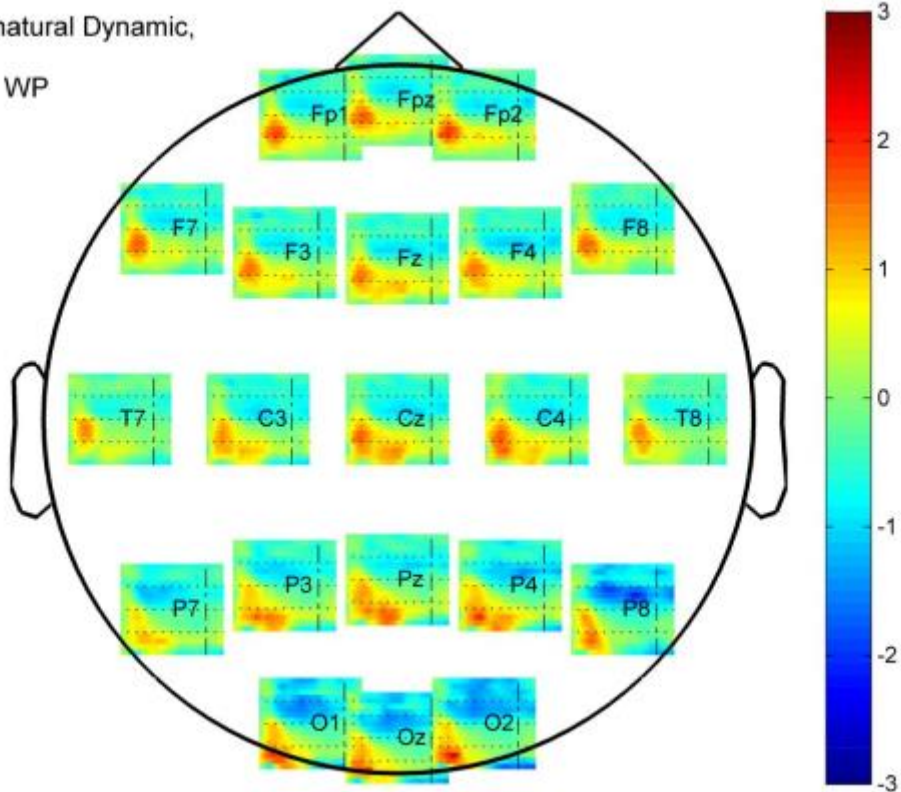



Figure H.

Topography with *PLI* (a) and *WP* (b) time-frequency diagrams (21 electrodes of the 10-20 international system) of the Happy Unnatural Dynamic condition.

a)

Happy Unnatural Dynamic,

PLI

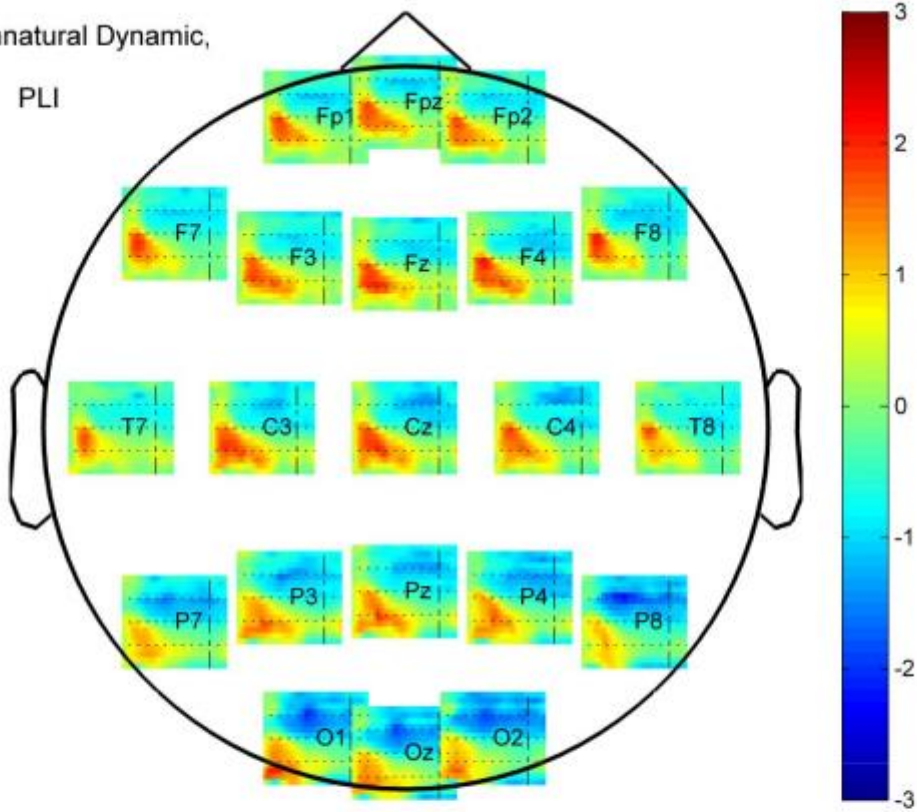

b)

Happy Unnatural Dynamic,

WP

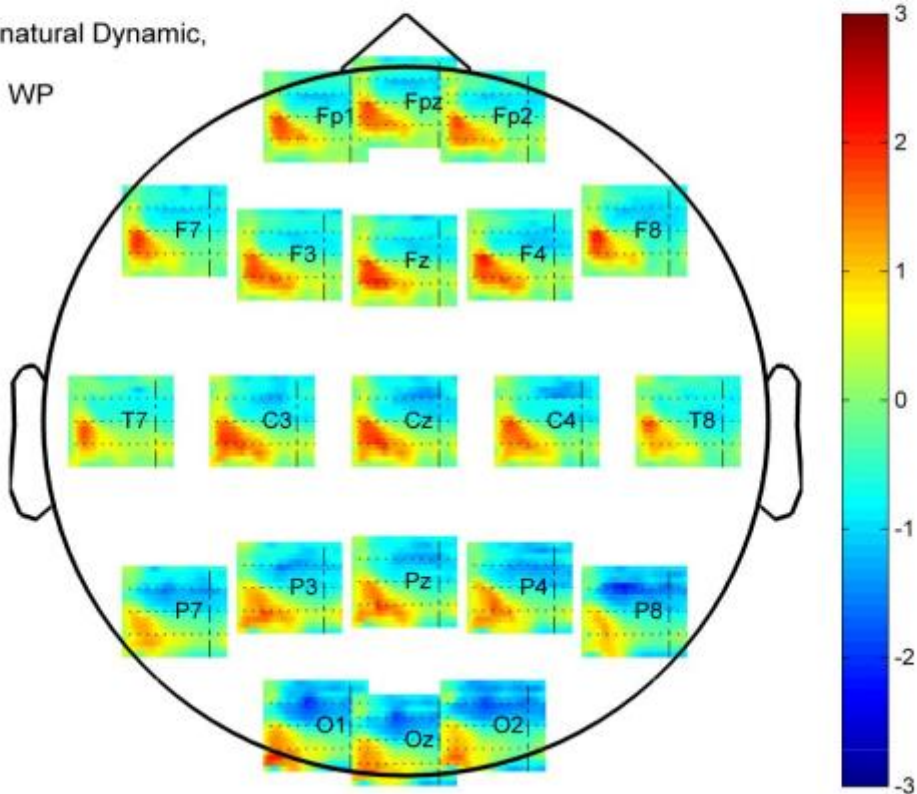

**Table A**

Validation rating for variable 'Angry'.

(Friedman test with "hsd" correction, using MATLAB function multcompare.m)

| 'Cond A'            | 'Cond B'          | 'lower<br>95%<br>bound' | 'mean'   | 'upper<br>95%<br>bound' | 'p-value' |
|---------------------|-------------------|-------------------------|----------|-------------------------|-----------|
| EXPRESSION          |                   |                         |          |                         |           |
| 'angry'             | 'happy'           | 6,31841                 | 9,83621  | 13,35401                | 0,00000*  |
| MOTION              |                   |                         |          |                         |           |
| 'dynamic'           | 'static'          | -2,90701                | 1,29957  | 5,50615                 | 0,74922   |
| 'dynamic'           | 'unnatural'       | -6,99969                | -2,79310 | 1,41348                 | 0,26487   |
| 'static'            | 'unnatural'       | -8,29926                | -4,09267 | 0,11391                 | 0,05859   |
| EXPRESSION x MOTION |                   |                         |          |                         |           |
| 'angry-dynamic'     | 'angry-static'    | -3,73547                | 1,37931  | 6,49410                 | 0,97279   |
| 'angry-dynamic'     | 'angry-unnatural' | -5,53720                | -0,42241 | 4,69237                 | 0,99990   |
| 'angry-dynamic'     | 'happy-dynamic'   | 6,35504                 | 11,46983 | 16,58461                | 0,00000*  |
| 'angry-dynamic'     | 'happy-static'    | 7,57487                 | 12,68966 | 17,80444                | 0,00000*  |
| 'angry-dynamic'     | 'happy-unnatural' | 1,19125                 | 6,30603  | 11,42082                | 0,00590 * |
| 'angry-static'      | 'angry-unnatural' | -6,91651                | -1,80172 | 3,31306                 | 0,91685   |
| 'angry-static'      | 'happy-dynamic'   | 4,97573                 | 10,09052 | 15,20530                | 0,00000*  |
| 'angry-static'      | 'happy-static'    | 6,19556                 | 11,31034 | 16,42513                | 0,00000*  |
| 'angry-static'      | 'happy-unnatural' | -0,18806                | 4,92672  | 10,04151                | 0,06672   |
| 'angry-unnatural'   | 'happy-dynamic'   | 6,77746                 | 11,89224 | 17,00703                | 0,00000*  |
| 'angry-unnatural'   | 'happy-static'    | 7,99728                 | 13,11207 | 18,22685                | 0,00000*  |
| 'angry-unnatural'   | 'happy-unnatural' | 1,61366                 | 6,72845  | 11,84323                | 0,00245*  |
| 'happy-dynamic'     | 'happy-static'    | -3,89496                | 1,21983  | 6,33461                 | 0,98423   |
| 'happy-dynamic'     | 'happy-unnatural' | -10,27858               | -5,16379 | -0,04901                | 0,04627*  |
| 'happy-static'      | 'happy-unnatural' | -11,49841               | -6,38362 | -1,26884                | 0,00505*  |

**Table B**

Validation rating for variable 'Happy'.

(Friedman test with "hsd" correction, using MATLAB function multcompare.m)

| 'Cond A'                   | 'Cond B'          | 'lower<br>95%<br>bound' | 'mean'    | 'upper<br>95%<br>bound' | 'p-value' |
|----------------------------|-------------------|-------------------------|-----------|-------------------------|-----------|
| <b>EXPRESSION</b>          |                   |                         |           |                         |           |
| 'angry'                    | 'happy'           | -14,14495               | -10,64080 | -7,13666                | 0,00000*  |
| <b>MOTION</b>              |                   |                         |           |                         |           |
| 'dynamic'                  | 'static'          | -5,85404                | -1,66379  | 2,52646                 | 0,62090   |
| 'dynamic'                  | 'unnatural'       | -1,99628                | 2,19397   | 6,38421                 | 0,43708   |
| 'static'                   | 'unnatural'       | -0,33249                | 3,85776   | 8,04801                 | 0,07862   |
| <b>EXPRESSION x MOTION</b> |                   |                         |           |                         |           |
| 'angry-dynamic'            | 'angry-static'    | -7,11216                | -2,01724  | 3,07768                 | 0,86977   |
| 'angry-dynamic'            | 'angry-unnatural' | -6,28027                | -1,18534  | 3,90958                 | 0,98590   |
| 'angry-dynamic'            | 'happy-dynamic'   | -18,22423               | -13,12931 | -8,03439                | 0,00000*  |
| 'angry-dynamic'            | 'happy-static'    | -19,53458               | -14,43966 | -9,34473                | 0,00000*  |
| 'angry-dynamic'            | 'happy-unnatural' | -12,65096               | -7,55603  | -2,46111                | 0,00034*  |
| 'angry-static'             | 'angry-unnatural' | -4,26303                | 0,83190   | 5,92682                 | 0,99729   |
| 'angry-static'             | 'happy-dynamic'   | -16,20699               | -11,11207 | -6,01715                | 0,00000*  |
| 'angry-static'             | 'happy-static'    | -17,51734               | -12,42241 | -7,32749                | 0,00000*  |
| 'angry-static'             | 'happy-unnatural' | -10,63372               | -5,53879  | -0,44387                | 0,02391*  |
| 'angry-unnatural'          | 'happy-dynamic'   | -17,03889               | -11,94397 | -6,84904                | 0,00000*  |
| 'angry-unnatural'          | 'happy-static'    | -18,34923               | -13,25431 | -8,15939                | 0,00000*  |
| 'angry-unnatural'          | 'happy-unnatural' | -11,46561               | -6,37069  | -1,27577                | 0,00493*  |
| 'happy-dynamic'            | 'happy-static'    | -6,40527                | -1,31034  | 3,78458                 | 0,97791   |
| 'happy-dynamic'            | 'happy-unnatural' | 0,47835                 | 5,57328   | 10,66820                | 0,02251*  |
| 'happy-static'             | 'happy-unnatural' | 1,78870                 | 6,88362   | 11,97854                | 0,00165*  |

**Table C**

Validation rating for variable 'Movement'.

(Friedman test with "hsd" correction, using MATLAB function multcompare.m)

| 'Cond A'                   | 'Cond B'          | 'lower<br>95%<br>bound' | 'mean'   | 'upper<br>95%<br>bound' | 'p-value' |
|----------------------------|-------------------|-------------------------|----------|-------------------------|-----------|
| <b>EXPRESSION</b>          |                   |                         |          |                         |           |
| 'angry'                    | 'happy'           | -6,31320                | -2,71839 | 0,87642                 | 0,13831   |
| <b>MOTION</b>              |                   |                         |          |                         |           |
| 'dynamic'                  | 'static'          | -3,93444                | 0,36422  | 4,66289                 | 0,97850   |
| 'dynamic'                  | 'unnatural'       | -2,86548                | 1,43319  | 5,73186                 | 0,71448   |
| 'static'                   | 'unnatural'       | -3,22970                | 1,06897  | 5,36763                 | 0,82933   |
| <b>EXPRESSION x MOTION</b> |                   |                         |          |                         |           |
| 'angry-dynamic'            | 'angry-static'    | -4,86037                | 0,36638  | 5,59313                 | 0,99996   |
| 'angry-dynamic'            | 'angry-unnatural' | -4,61899                | 0,60776  | 5,83451                 | 0,99947   |
| 'angry-dynamic'            | 'happy-dynamic'   | -8,49399                | -3,26724 | 1,95951                 | 0,47785   |
| 'angry-dynamic'            | 'happy-static'    | -8,13192                | -2,90517 | 2,32158                 | 0,60922   |
| 'angry-dynamic'            | 'happy-unnatural' | -6,23537                | -1,00862 | 4,21813                 | 0,99404   |
| 'angry-static'             | 'angry-unnatural' | -4,98537                | 0,24138  | 5,46813                 | 0,99999   |
| 'angry-static'             | 'happy-dynamic'   | -8,86037                | -3,63362 | 1,59313                 | 0,35315   |
| 'angry-static'             | 'happy-static'    | -8,49830                | -3,27155 | 1,95520                 | 0,47631   |
| 'angry-static'             | 'happy-unnatural' | -6,60175                | -1,37500 | 3,85175                 | 0,97559   |
| 'angry-unnatural'          | 'happy-dynamic'   | -9,10175                | -3,87500 | 1,35175                 | 0,28053   |
| 'angry-unnatural'          | 'happy-static'    | -8,73968                | -3,51293 | 1,71382                 | 0,39260   |
| 'angry-unnatural'          | 'happy-unnatural' | -6,84313                | -1,61638 | 3,61037                 | 0,95109   |
| 'happy-dynamic'            | 'happy-static'    | -4,86468                | 0,36207  | 5,58882                 | 0,99996   |
| 'happy-dynamic'            | 'happy-unnatural' | -2,96813                | 2,25862  | 7,48537                 | 0,82152   |
| 'happy-static'             | 'happy-unnatural' | -3,33020                | 1,89655  | 7,12330                 | 0,90658   |

**Table D**

Validation rating for variable 'Naturalness'.

(Friedman test with "hsd" correction, using MATLAB function multcompare.m)

| 'Cond A'                   | 'Cond B'          | 'lower<br>95%<br>bound' | 'mean'   | 'upper<br>95%<br>bound' | 'p-value' |
|----------------------------|-------------------|-------------------------|----------|-------------------------|-----------|
| <b>EXPRESSION</b>          |                   |                         |          |                         |           |
| 'angry'                    | 'happy'           | -3,85282                | -0,25862 | 3,33558                 | 0,88785   |
| <b>MOTION</b>              |                   |                         |          |                         |           |
| 'dynamic'                  | 'static'          | -4,84105                | -0,54310 | 3,75484                 | 0,95280   |
| 'dynamic'                  | 'unnatural'       | 3,85508                 | 8,15302  | 12,45096                | 0,00000*  |
| 'static'                   | 'unnatural'       | 4,39818                 | 8,69612  | 12,99406                | 0,00000*  |
| <b>EXPRESSION x MOTION</b> |                   |                         |          |                         |           |
| 'angry-dynamic'            | 'angry-static'    | -1,14828                | 4,07759  | 9,30345                 | 0,22678   |
| 'angry-dynamic'            | 'angry-unnatural' | -7,35087                | -2,12500 | 3,10087                 | 0,85635   |
| 'angry-dynamic'            | 'happy-dynamic'   | -9,16983                | -3,94397 | 1,28190                 | 0,26132   |
| 'angry-dynamic'            | 'happy-static'    | 4,87758                 | 10,10345 | 15,32932                | 0,00000*  |
| 'angry-dynamic'            | 'happy-unnatural' | -1,88104                | 3,34483  | 8,57069                 | 0,45015   |
| 'angry-static'             | 'angry-unnatural' | -8,08363                | -2,85776 | 2,36811                 | 0,62616   |
| 'angry-static'             | 'happy-dynamic'   | -9,90259                | -4,67672 | 0,54914                 | 0,10988   |
| 'angry-static'             | 'happy-static'    | 4,14482                 | 9,37069  | 14,59656                | 0,00000*  |
| 'angry-static'             | 'happy-unnatural' | -11,42845               | -6,20259 | -0,97672                | 0,00938*  |
| 'angry-unnatural'          | 'happy-dynamic'   | -13,24742               | -8,02155 | -2,79568                | 0,00018*  |
| 'angry-unnatural'          | 'happy-static'    | 0,79999                 | 6,02586  | 11,25173                | 0,01302*  |
| 'angry-unnatural'          | 'happy-unnatural' | -7,04483                | -1,81897 | 3,40690                 | 0,92070   |
| 'happy-dynamic'            | 'happy-static'    | 7,00258                 | 12,22845 | 17,45432                | 0,00000*  |
| 'happy-dynamic'            | 'happy-unnatural' | 8,82155                 | 14,04741 | 19,27328                | 0,00000*  |
| 'happy-static'             | 'happy-unnatural' | -1,14828                | 4,07759  | 9,30345                 | 0,22678   |

**Table E**

Error rates of standard stimuli.

(Friedman test with “hsd” correction, using MATLAB function multcompare.m)

| 'Cond A'            | 'Cond B'          | 'lower<br>95%<br>bound' | 'mean'   | 'upper<br>95%<br>bound' | 'p-value' |
|---------------------|-------------------|-------------------------|----------|-------------------------|-----------|
| EXPRESSION          |                   |                         |          |                         |           |
| 'angry'             | 'happy'           | -4,51673                | -2,12644 | 0,26386                 | 0,08123   |
| MOTION              |                   |                         |          |                         |           |
| 'dynamic'           | 'static'          | -2,96392                | -0,10560 | 2,75271                 | 0,99587   |
| 'dynamic'           | 'unnatural'       | -6,14064                | -3,28233 | -0,42401                | 0,01948*  |
| 'static'            | 'unnatural'       | -6,03504                | -3,17672 | -0,31841                | 0,02493*  |
| EXPRESSION x MOTION |                   |                         |          |                         |           |
| 'angry-dynamic'     | 'angry-static'    | -3,97112                | -0,49569 | 2,97974                 | 0,99858   |
| 'angry-dynamic'     | 'angry-unnatural' | -4,72974                | -1,25431 | 2,22112                 | 0,90852   |
| 'angry-dynamic'     | 'happy-dynamic'   | -4,50991                | -1,03448 | 2,44094                 | 0,95836   |
| 'angry-dynamic'     | 'happy-static'    | -4,22543                | -0,75000 | 2,72543                 | 0,98999   |
| 'angry-dynamic'     | 'happy-unnatural' | -9,82025                | -6,34483 | -2,86940                | 0,00000*  |
| 'angry-static'      | 'angry-unnatural' | -4,23405                | -0,75862 | 2,71680                 | 0,98945   |
| 'angry-static'      | 'happy-dynamic'   | -4,01422                | -0,53879 | 2,93663                 | 0,99788   |
| 'angry-static'      | 'happy-static'    | -3,72974                | -0,25431 | 3,22112                 | 0,99995   |
| 'angry-static'      | 'happy-unnatural' | -9,32456                | -5,84914 | -2,37371                | 0,00000*  |
| 'angry-unnatural'   | 'happy-dynamic'   | -3,25560                | 0,21983  | 3,69525                 | 0,99997   |
| 'angry-unnatural'   | 'happy-static'    | -2,97112                | 0,50431  | 3,97974                 | 0,99846   |
| 'angry-unnatural'   | 'happy-unnatural' | -8,56594                | -5,09052 | -1,61509                | 0,00043*  |
| 'happy-dynamic'     | 'happy-static'    | -3,19094                | 0,28448  | 3,75991                 | 0,99991   |
| 'happy-dynamic'     | 'happy-unnatural' | -8,78577                | -5,31034 | -1,83492                | 0,00019*  |
| 'happy-static'      | 'happy-unnatural' | -9,07025                | -5,59483 | -2,11940                | 0,00000*  |

**Table F**

Error rates of deviant stimuli.

(Friedman test with “hsd” correction, using MATLAB function multcompare.m)

| 'Cond A'            | 'Cond B'          | 'lower<br>95%<br>bound' | 'mean'    | 'upper<br>95%<br>bound' | 'p-value' |
|---------------------|-------------------|-------------------------|-----------|-------------------------|-----------|
| EXPRESSION          |                   |                         |           |                         |           |
| 'angry'             | 'happy'           | -3,20033                | 0,12644   | 3,45321                 | 0,94062   |
| MOTION              |                   |                         |           |                         |           |
| 'dynamic'           | 'static'          | -4,00832                | -0,03017  | 3,94797                 | 0,99983   |
| 'dynamic'           | 'unnatural'       | -10,32297               | -6,34483  | -2,36668                | 0,00054*  |
| 'static'            | 'unnatural'       | -10,29280               | -6,31466  | -2,33651                | 0,00058*  |
| EXPRESSION x MOTION |                   |                         |           |                         |           |
| 'angry-dynamic'     | 'angry-static'    | -4,55255                | 0,28448   | 5,12151                 | 0,99998   |
| 'angry-dynamic'     | 'angry-unnatural' | -7,10858                | -2,27155  | 2,56548                 | 0,76364   |
| 'angry-dynamic'     | 'happy-dynamic'   | -1,78530                | 3,05172   | 7,88875                 | 0,46704   |
| 'angry-dynamic'     | 'happy-static'    | -2,13013                | 2,70690   | 7,54393                 | 0,60203   |
| 'angry-dynamic'     | 'happy-unnatural' | -12,20341               | -7,36638  | -2,52935                | 0,00021*  |
| 'angry-static'      | 'angry-unnatural' | -7,39306                | -2,55603  | 2,28099                 | 0,66050   |
| 'angry-static'      | 'happy-dynamic'   | -2,06979                | 2,76724   | 7,60427                 | 0,57832   |
| 'angry-static'      | 'happy-static'    | -2,41462                | 2,42241   | 7,25944                 | 0,71046   |
| 'angry-static'      | 'happy-unnatural' | -12,48789               | -7,65086  | -2,81383                | 0,00000*  |
| 'angry-unnatural'   | 'happy-dynamic'   | 0,48625                 | 5,32328   | 10,16030                | 0,02120*  |
| 'angry-unnatural'   | 'happy-static'    | 0,14142                 | 4,97845   | 9,81548                 | 0,03936*  |
| 'angry-unnatural'   | 'happy-unnatural' | -9,93186                | -5,09483  | -0,25780                | 0,03212*  |
| 'happy-dynamic'     | 'happy-static'    | -5,18186                | -0,34483  | 4,49220                 | 0,99995   |
| 'happy-dynamic'     | 'happy-unnatural' | -15,25513               | -10,41810 | -5,58107                | 0,00000*  |
| 'happy-static'      | 'happy-unnatural' | -14,91030               | -10,07328 | -5,23625                | 0,00000*  |

**Table G**

SPSS output for a two-way repeated measures ANOVA on the logarithms of reaction times, with pairwise multiple comparisons of marginal means.

## General Linear Model

### Notes

|                        |                                |                                                                                                                                       |
|------------------------|--------------------------------|---------------------------------------------------------------------------------------------------------------------------------------|
| Output Created         |                                | 24-JUN-2017 21:10:39                                                                                                                  |
| Comments               |                                |                                                                                                                                       |
| Input                  | Data                           | /Users/dionperd/Dropbox/Work/PostDocBerlin/Publications/BrainSynchronyFEES/DataOnline/behavioral_data/reaction_time/reactionTimes.sav |
|                        | Active Dataset                 | DataSet1                                                                                                                              |
|                        | Filter                         | <none>                                                                                                                                |
|                        | Weight                         | <none>                                                                                                                                |
|                        | Split File                     | <none>                                                                                                                                |
|                        | N of Rows in Working Data File | 29                                                                                                                                    |
| Missing Value Handling | Definition of Missing          | User-defined missing values are treated as missing.                                                                                   |
|                        | Cases Used                     | Statistics are based on all cases with valid data for all variables in the model.                                                     |



## Syntax

```
GLM log_angry_Dynamic
log_angry_Static
log_angry_Unnatural
log_happy_Dynamic
log_happy_Static
log_happy_Unnatural

/WSFACTOR=EXPRESSION
2 Polynomial MOTION
3 Polynomial

/MEASURE=Reaction_Times
/METHOD=SSTYPE(3)

/EMMEANS=TABLES(OVERALL)

/EMMEANS=TABLES(EXPRESSION) COMPARE
ADJ(BONFERRONI)

/EMMEANS=TABLES(MOTION) COMPARE
ADJ(BONFERRONI)

/EMMEANS=TABLES(EXPRESSION*MOTION)
/CRITERIA=ALPHA(.05)

/WSDESIGN=EXPRESSION
MOTION
EXPRESSION*MOTION.
```

|           |                |             |
|-----------|----------------|-------------|
| Resources | Processor Time | 00:00:00.02 |
|           | Elapsed Time   | 00:00:00.00 |

[DataSet1]

/Users/dionperd/Dropbox/Work/PostDocBerlin/Publications/BrainSynchronyFEES/DataOnline/behavioral\_data/reaction\_time/reactionTimes.sav

## Within-Subjects Factors

Measure: Reaction\_Times

| EXPRESSION | MOTION | Dependent Variable  |
|------------|--------|---------------------|
| 1          | 1      | log_angry_Dynamic   |
|            | 2      | log_angry_Static    |
|            | 3      | log_angry_Unnatural |
| 2          | 1      | log_happy_Dynamic   |
|            | 2      | log_happy_Static    |
|            | 3      | log_happy_Unnatural |

## Multivariate Tests<sup>a</sup>

| Effect              |                    | Value | F                   | Hypothesis df | Error df | Sig. |
|---------------------|--------------------|-------|---------------------|---------------|----------|------|
| EXPRESSION          | Pillai's Trace     | .385  | 14.421 <sup>b</sup> | 1.000         | 23.000   | .001 |
|                     | Wilks' Lambda      | .615  | 14.421 <sup>b</sup> | 1.000         | 23.000   | .001 |
|                     | Hotelling's Trace  | .627  | 14.421 <sup>b</sup> | 1.000         | 23.000   | .001 |
|                     | Roy's Largest Root | .627  | 14.421 <sup>b</sup> | 1.000         | 23.000   | .001 |
| MOTION              | Pillai's Trace     | .881  | 81.817 <sup>b</sup> | 2.000         | 22.000   | .000 |
|                     | Wilks' Lambda      | .119  | 81.817 <sup>b</sup> | 2.000         | 22.000   | .000 |
|                     | Hotelling's Trace  | 7.438 | 81.817 <sup>b</sup> | 2.000         | 22.000   | .000 |
|                     | Roy's Largest Root | 7.438 | 81.817 <sup>b</sup> | 2.000         | 22.000   | .000 |
| EXPRESSION * MOTION | Pillai's Trace     | .619  | 17.835 <sup>b</sup> | 2.000         | 22.000   | .000 |
|                     | Wilks' Lambda      | .381  | 17.835 <sup>b</sup> | 2.000         | 22.000   | .000 |
|                     | Hotelling's Trace  | 1.621 | 17.835 <sup>b</sup> | 2.000         | 22.000   | .000 |
|                     | Roy's Largest Root | 1.621 | 17.835 <sup>b</sup> | 2.000         | 22.000   | .000 |

a. Design: Intercept

Within Subjects Design: EXPRESSION + MOTION + EXPRESSION \* MOTION

b. Exact statistic

## Mauchly's Test of Sphericity<sup>a</sup>

Measure: Reaction\_Times

| Within Subjects Effect | Mauchly's W | Approx. Chi-Square | df | Sig. | Epsilon <sup>b</sup> |             |
|------------------------|-------------|--------------------|----|------|----------------------|-------------|
|                        |             |                    |    |      | Greenhouse-Geisser   | Huynh-Feldt |
|                        |             |                    |    |      |                      |             |

|                        |       |        |   |      |       |       |
|------------------------|-------|--------|---|------|-------|-------|
| EXPRESSION             | 1.000 | .000   | 0 | .    | 1.000 | 1.000 |
| MOTION                 | .709  | 7.564  | 2 | .023 | .775  | .820  |
| EXPRESSION *<br>MOTION | .236  | 31.755 | 2 | .000 | .567  | .577  |

### Mauchly's Test of Sphericity<sup>a</sup>

Measure: Reaction\_Times

| Within Subjects Effect | Epsilon<br>Lower-bound |
|------------------------|------------------------|
| EXPRESSION             | 1.000                  |
| MOTION                 | .500                   |
| EXPRESSION * MOTION    | .500                   |

Tests the null hypothesis that the error covariance matrix of the orthonormalized transformed dependent variables is proportional to an identity matrix.<sup>a</sup>

a. Design: Intercept

Within Subjects Design: EXPRESSION + MOTION + EXPRESSION \* MOTION

b. May be used to adjust the degrees of freedom for the averaged tests of significance. Corrected tests are displayed in the Tests of Within-Subjects Effects table.

### Tests of Within-Subjects Effects

Measure: Reaction\_Times

| Source            |                        | Type III Sum<br>of Squares | df     | Mean<br>Square | F       | Sig. |
|-------------------|------------------------|----------------------------|--------|----------------|---------|------|
| EXPRESSION        | Sphericity<br>Assumed  | .143                       | 1      | .143           | 14.421  | .001 |
|                   | Greenhouse-<br>Geisser | .143                       | 1.000  | .143           | 14.421  | .001 |
|                   | Huynh-Feldt            | .143                       | 1.000  | .143           | 14.421  | .001 |
|                   | Lower-bound            | .143                       | 1.000  | .143           | 14.421  | .001 |
| Error(EXPRESSION) | Sphericity<br>Assumed  | .228                       | 23     | .010           |         |      |
|                   | Greenhouse-<br>Geisser | .228                       | 23.000 | .010           |         |      |
|                   | Huynh-Feldt            | .228                       | 23.000 | .010           |         |      |
|                   | Lower-bound            | .228                       | 23.000 | .010           |         |      |
| MOTION            | Sphericity<br>Assumed  | 2.406                      | 2      | 1.203          | 122.043 | .000 |
|                   | Greenhouse-<br>Geisser | 2.406                      | 1.549  | 1.553          | 122.043 | .000 |
|                   | Huynh-Feldt            | 2.406                      | 1.640  | 1.467          | 122.043 | .000 |
|                   | Lower-bound            | 2.406                      | 1.000  | 2.406          | 122.043 | .000 |
| Error(MOTION)     | Sphericity<br>Assumed  | .454                       | 46     | .010           |         |      |
|                   | Greenhouse-<br>Geisser | .454                       | 35.633 | .013           |         |      |

|                              |                        |      |        |      |        |      |
|------------------------------|------------------------|------|--------|------|--------|------|
|                              | Huynh-Feldt            | .454 | 37.723 | .012 |        |      |
|                              | Lower-bound            | .454 | 23.000 | .020 |        |      |
| EXPRESSION *<br>MOTION       | Sphericity<br>Assumed  | .258 | 2      | .129 | 18.827 | .000 |
|                              | Greenhouse-<br>Geisser | .258 | 1.134  | .228 | 18.827 | .000 |
|                              | Huynh-Feldt            | .258 | 1.153  | .224 | 18.827 | .000 |
|                              | Lower-bound            | .258 | 1.000  | .258 | 18.827 | .000 |
| Error(EXPRESSION*<br>MOTION) | Sphericity<br>Assumed  | .316 | 46     | .007 |        |      |
|                              | Greenhouse-<br>Geisser | .316 | 26.079 | .012 |        |      |
|                              | Huynh-Feldt            | .316 | 26.520 | .012 |        |      |
|                              | Lower-bound            | .316 | 23.000 | .014 |        |      |

### Tests of Within-Subjects Contrasts

Measure: Reaction\_Times

| Source                       | EXPRESSION<br>MOTION | Type III Sum<br>of Squares | df | Mean<br>Square | F       | Sig. |
|------------------------------|----------------------|----------------------------|----|----------------|---------|------|
| EXPRESSION                   | Linear               | .143                       | 1  | .143           | 14.421  | .001 |
| Error(EXPRESSION)            | Linear               | .228                       | 23 | .010           |         |      |
| MOTION                       | Linear               | .335                       | 1  | .335           | 44.059  | .000 |
|                              | Quadratic            | 2.071                      | 1  | 2.071          | 171.065 | .000 |
| Error(MOTION)                | Linear               | .175                       | 23 | .008           |         |      |
|                              | Quadratic            | .278                       | 23 | .012           |         |      |
| EXPRESSION *<br>MOTION       | Linear               | .256                       | 1  | .256           | 22.345  | .000 |
|                              | Quadratic            | .003                       | 1  | .003           | 1.105   | .304 |
| Error(EXPRESSION*<br>MOTION) | Linear               | .263                       | 23 | .011           |         |      |
|                              | Quadratic            | .052                       | 23 | .002           |         |      |

### Tests of Between-Subjects Effects

Measure: Reaction\_Times

Transformed Variable: Average

| Source    | Type III Sum of<br>Squares | df | Mean Square | F    | Sig. |
|-----------|----------------------------|----|-------------|------|------|
| Intercept | .007                       | 1  | .007        | .075 | .786 |
| Error     | 2.115                      | 23 | .092        |      |      |

# Estimated Marginal Means

## 1. Grand Mean

Measure: Reaction\_Times

| Mean | Std. Error | 95% Confidence Interval |             |
|------|------------|-------------------------|-------------|
|      |            | Lower Bound             | Upper Bound |
| .007 | .025       | -.045                   | .059        |

## 2. EXPRESSION

### Estimates

Measure: Reaction\_Times

| EXPRESSION | Mean  | Std. Error | 95% Confidence Interval |             |
|------------|-------|------------|-------------------------|-------------|
|            |       |            | Lower Bound             | Upper Bound |
| 1          | .038  | .024       | -.012                   | .089        |
| 2          | -.025 | .029       | -.084                   | .034        |

### Pairwise Comparisons

Measure: Reaction\_Times

| (I) EXPRESSION | (J) EXPRESSION | Mean Difference (I-J) | Std. Error | Sig. <sup>b</sup> | 95% Confidence Interval for Difference <sup>b</sup> |             |
|----------------|----------------|-----------------------|------------|-------------------|-----------------------------------------------------|-------------|
|                |                |                       |            |                   | Lower Bound                                         | Upper Bound |
| 1              | 2              | .063*                 | .017       | .001              | .029                                                | .097        |
| 2              | 1              | -.063*                | .017       | .001              | -.097                                               | -.029       |

Based on estimated marginal means

\*. The mean difference is significant at the

b. Adjustment for multiple comparisons: Bonferroni.

### Multivariate Tests

|                    | Value | F                   | Hypothesis df | Error df | Sig. |
|--------------------|-------|---------------------|---------------|----------|------|
| Pillai's trace     | .385  | 14.421 <sup>a</sup> | 1.000         | 23.000   | .001 |
| Wilks' lambda      | .615  | 14.421 <sup>a</sup> | 1.000         | 23.000   | .001 |
| Hotelling's trace  | .627  | 14.421 <sup>a</sup> | 1.000         | 23.000   | .001 |
| Roy's largest root | .627  | 14.421 <sup>a</sup> | 1.000         | 23.000   | .001 |

Each F tests the multivariate effect of EXPRESSION. These tests are based on the linearly independent pairwise comparisons among the estimated marginal means.

a. Exact statistic

### 3. MOTION

#### Estimates

Measure: Reaction\_Times

| MOTION | Mean  | Std. Error | 95% Confidence Interval |             |
|--------|-------|------------|-------------------------|-------------|
|        |       |            | Lower Bound             | Upper Bound |
| 1      | .033  | .028       | -.026                   | .091        |
| 2      | -.163 | .020       | -.204                   | -.122       |
| 3      | .151  | .034       | .081                    | .221        |

#### Pairwise Comparisons

Measure: Reaction\_Times

| (I) MOTION | (J) MOTION | Mean Difference (I-J) | Std. Error | Sig. <sup>b</sup> | 95% Confidence Interval for Difference <sup>b</sup> |             |
|------------|------------|-----------------------|------------|-------------------|-----------------------------------------------------|-------------|
|            |            |                       |            |                   | Lower Bound                                         | Upper Bound |
| 1          | 2          | .195*                 | .017       | .000              | .152                                                | .239        |
|            | 3          | -.118*                | .018       | .000              | -.164                                               | -.072       |
| 2          | 1          | -.195*                | .017       | .000              | -.239                                               | -.152       |
|            | 3          | -.314*                | .025       | .000              | -.378                                               | -.249       |
| 3          | 1          | .118*                 | .018       | .000              | .072                                                | .164        |
|            | 2          | .314*                 | .025       | .000              | .249                                                | .378        |

Based on estimated marginal means

\*. The mean difference is significant at the

b. Adjustment for multiple comparisons: Bonferroni.

#### Multivariate Tests

|                    | Value | F                   | Hypothesis df | Error df | Sig. |
|--------------------|-------|---------------------|---------------|----------|------|
| Pillai's trace     | .881  | 81.817 <sup>a</sup> | 2.000         | 22.000   | .000 |
| Wilks' lambda      | .119  | 81.817 <sup>a</sup> | 2.000         | 22.000   | .000 |
| Hotelling's trace  | 7.438 | 81.817 <sup>a</sup> | 2.000         | 22.000   | .000 |
| Roy's largest root | 7.438 | 81.817 <sup>a</sup> | 2.000         | 22.000   | .000 |

Each F tests the multivariate effect of MOTION. These tests are based on the linearly independent pairwise comparisons among the estimated marginal means.

a. Exact statistic

#### 4. EXPRESSION \* MOTION

Measure: Reaction\_Times

| EXPRESSION | MOTION | Mean  | Std. Error | 95% Confidence Interval |             |
|------------|--------|-------|------------|-------------------------|-------------|
|            |        |       |            | Lower Bound             | Upper Bound |
| 1          | 1      | .113  | .030       | .052                    | .174        |
|            | 2      | -.125 | .020       | -.166                   | -.084       |
|            | 3      | .128  | .030       | .066                    | .190        |
| 2          | 1      | -.048 | .028       | -.106                   | .011        |
|            | 2      | -.200 | .022       | -.246                   | -.154       |
|            | 3      | .174  | .047       | .077                    | .270        |
